# Supplementary material for: The exchange bias behavior of BiFeO3 nanoparticles with natural core-shell structure
Source: PubMed Central journal article supplement (PMC5797215; doi:10.1038/s41598-018-19676-5), 2018-02-02
Supplement: 41598_2018_19676_MOESM1_ESM.pdf [file 41598_2018_19676_MOESM1_ESM.pdf]

## **Supplementary Information**

### **The exchange bias behavior of BiFeO<sub>3</sub> nanoparticles with natural core-shell structure**

Fengzhen Huang<sup>1,2</sup>, Xingyu Xu<sup>1</sup>, Xiaomei Lu<sup>1,2\*</sup>, Min Zhou<sup>1</sup>, Hai Sang<sup>1,2</sup> and

Jinsong Zhu<sup>1,2</sup>

<sup>1</sup>National Laboratory of Solid State Microstructures and Physics School, Nanjing University, Nanjing 210093, P. R. China, <sup>2</sup>Collaborative Innovation Center of Advanced Microstructures, Nanjing 210093, P. R. China. Correspondence and requests for materials should be addressed to X.M.L ([xiaomeil@nju.edu.cn](mailto:xiaomeil@nju.edu.cn)).

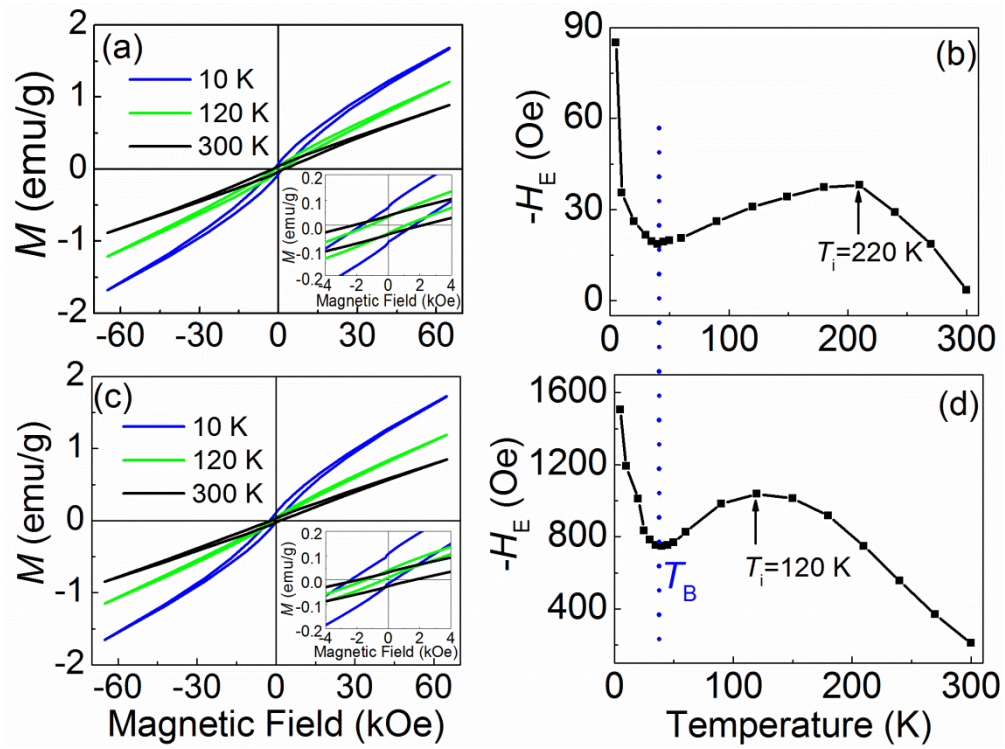

Figure S1. Magnetic measured results of 18 nm BiFeO<sub>3</sub> particles with maximum applied magnetic field of 65 kOe. Magnetic hysteresis ( $M$ - $H$ ) loops measured at various temperatures following (a) zero-field cooling (ZFC) and (c) 65 kOe cooling field. Temperature dependent exchange bias field ( $-H_E$ ) under (b) ZFC and (d) 65 kOe cooling field. Insets in (a) and (c) show the local amplification of the corresponding  $M$ - $H$  loops.

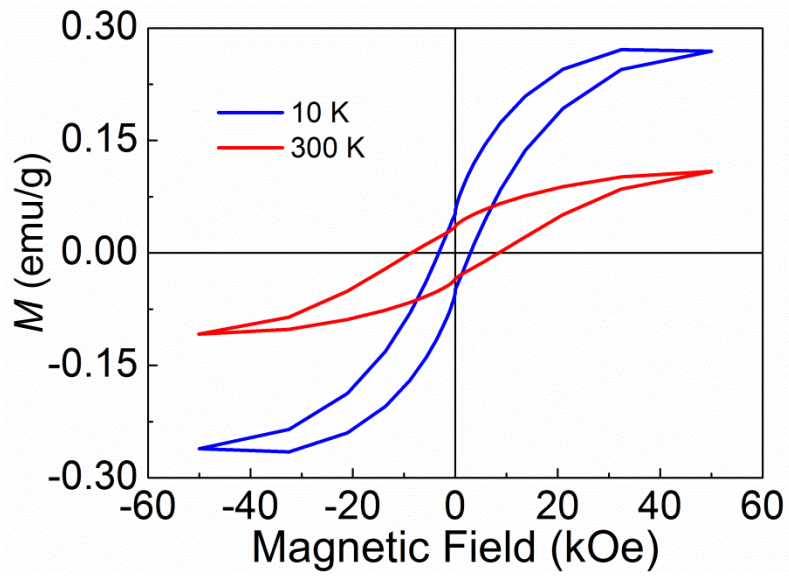

Figure S2. Ferromagnetic parts in the magnetic hysteresis curves of 18 nm BiFeO<sub>3</sub> particles at 10 and 300 K.

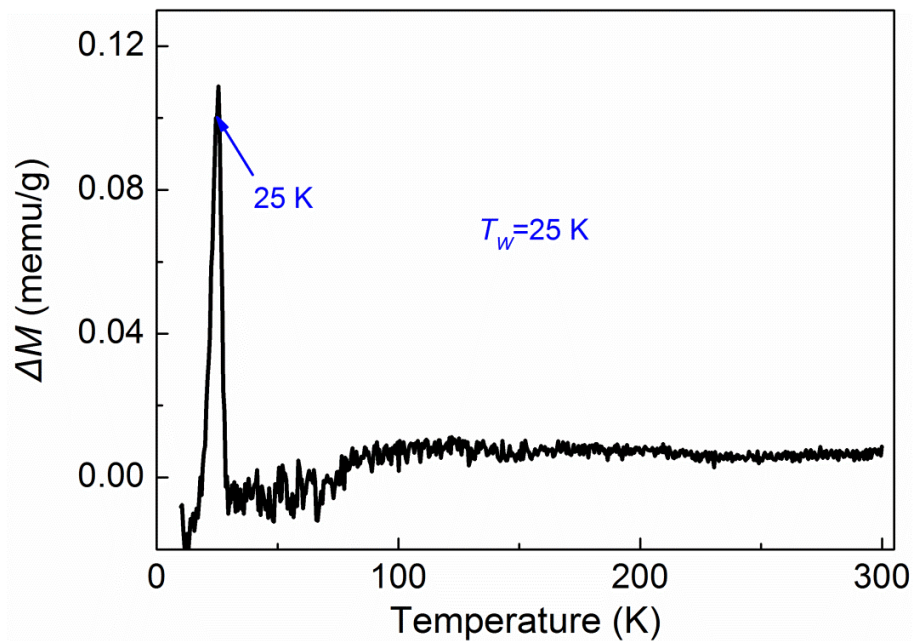

Figure S3. Magnetization difference ( $\Delta M$ ) between the reference and the stop-and-wait ZFC curves of 18 nm BiFeO<sub>3</sub> particles, where  $T_w = 25$  K, and the waiting time is 4 h.

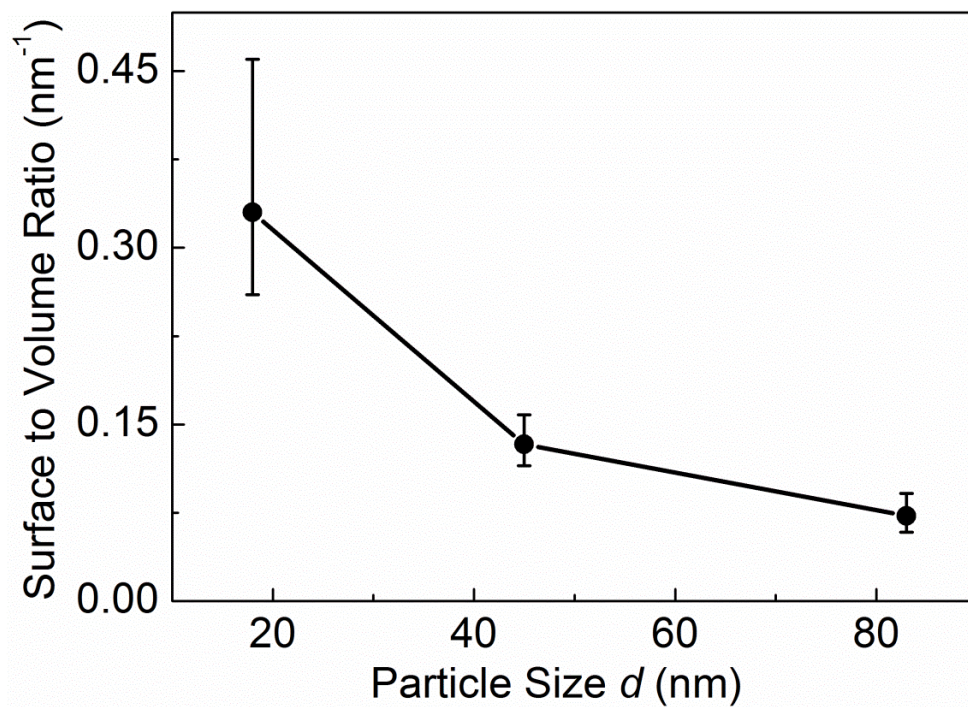

Figure S4. Surface-to-volume ratio of BiFeO<sub>3</sub> nanoparticles with various sizes (*d* is the diameter of the particle), which is calculated based on spheroidal particle model.
